# Supplementary material for: PKD1L1 Is Involved in Congenital Chylothorax
Source: MDPI journal article supplement (doi:10.3390/cells13020149), 2024-01-12
Supplement: s1 [file s1]

**Supplemental Table S1.** Molecular Details and Clinical Features of all five index families analysed with ES.

|                   | Family 1 (CHT3)       | Family 2 (PUV146)                                            | Family 3 (CHT17)                                                                                    | Family 4 (HRZ2)                                    | Family 5 (HRZ10)                                                                                    |
|-------------------|-----------------------|--------------------------------------------------------------|-----------------------------------------------------------------------------------------------------|----------------------------------------------------|-----------------------------------------------------------------------------------------------------|
| Molecular Details | Candidate Gene        | PKD1L1                                                       | PKD1L1                                                                                              | DNAH5                                              | No Results                                                                                          |
|                   | Zygosity              | Compound Heterozygous                                        | Compound Heterozygous                                                                               | Compound Heterozygous                              | No Results                                                                                          |
|                   | Inheritance           | Autosomal Recessive                                          | Autosomal Recessive                                                                                 | Autosomal Recessive                                | No Results                                                                                          |
|                   | gDNA location         | Chr7:47944902C>T<br>Chr7:47913548A>T                         | Chr7:47869647C>A<br>Chr7:47968998delT                                                               | Chr5:13850661G>A<br>Chr5:13882811T>A               |                                                                                                     |
|                   | Variant location      | c.1543G>A, p.Gly515Arg<br>c.3845T>A, p.Val1282Glu            | c.6549G>T, p.Gln2183His<br>c.863delA, p.Asn288Thrfs*3                                               | c.5105C>T, p.Ser1702Phe<br>c.3179A>T, p.Lys1060Met |                                                                                                     |
| Clinical Features | Sex                   | Female                                                       | Male                                                                                                | Male                                               | Female                                                                                              |
|                   | Age of Onset          | Congenital                                                   | Congenital                                                                                          | Congenital                                         | Congenital                                                                                          |
|                   | Primary Phenotype     | Chylothorax, left<br>Hydrops fetalis                         | Hydrothorax, bilateral<br>Hydrops fetalis                                                           | Chylothorax, left                                  | Pleural effusion, left<br>Chylothorax, bilateral                                                    |
|                   | Secondary Phenotype   | Persistent pulmonary<br>hypertension,<br>respiratory failure | Severe pulmonary hypoplasia,<br>persistent pulmonary<br>hypertension,<br>cardio-respiratory failure | Pneumothorax, bilateral<br>Lymphoedema             | No<br>Respiratory distress<br>syndrome, cardio-<br>respiratory failure,<br>persistent foramen ovale |
|                   | Prenatal intervention | 3x shunt insertion,<br>thoracocentesis                       | 3x shunt insertion                                                                                  | No                                                 | 1x shunt insertion<br>No                                                                            |
